# Supplementary material for: Insights into the historical assembly of global dryland floras: the diversification of Zygophyllaceae
Source: PubMed Central journal article supplement (PMC6234786; doi:10.1186/s12862-018-1277-z), 2018-11-09

**Additional file 2**

**Figure S1** Phylogenetic relationships of Zygophyllaceae based on the 4-marker dataset with 164 taxa. The bootstrap values ( $> 50\%$ ) are shown above the branches, and the Bayesian posterior probabilities ( $> 0.90$ ) are indicated below the branches. ML phylogram is presented in the upper left.

**Figure S2** Phylogenetic relationships of Zygophyllaceae based on three matrices (see Methods for details). The bootstrap values ( $> 50\%$ ) are shown above the branches. (a) matrix 1 with 22 taxa, each taxa with four sequences; (b) matrix 2 with 76 taxa, each taxa with three to four sequences; (c) matrix 3 with 142 taxa, each taxa with two to four sequences.

**Figure S3** Chronogram of Zygophyllaceae obtained from the BEAST analysis of the 4-marker dataset. Bars around the node ages indicate the 95% highest posterior density (HPD) intervals.

**Figure S4** Ancestral habitat reconstructions for five representative plant groups inhabiting in both dryland and non-dryland floras. (a) Afrian *Vachellia* (Fabaceae); (b) Sect. *Euphorbia* (Euphorbiaceae); (c) *Consolida* (Ranunculaceae); (d) *Austrostipa* (Poaceae); and (e) Subsect. *Hypericifoliae* (Euphorbiaceae).

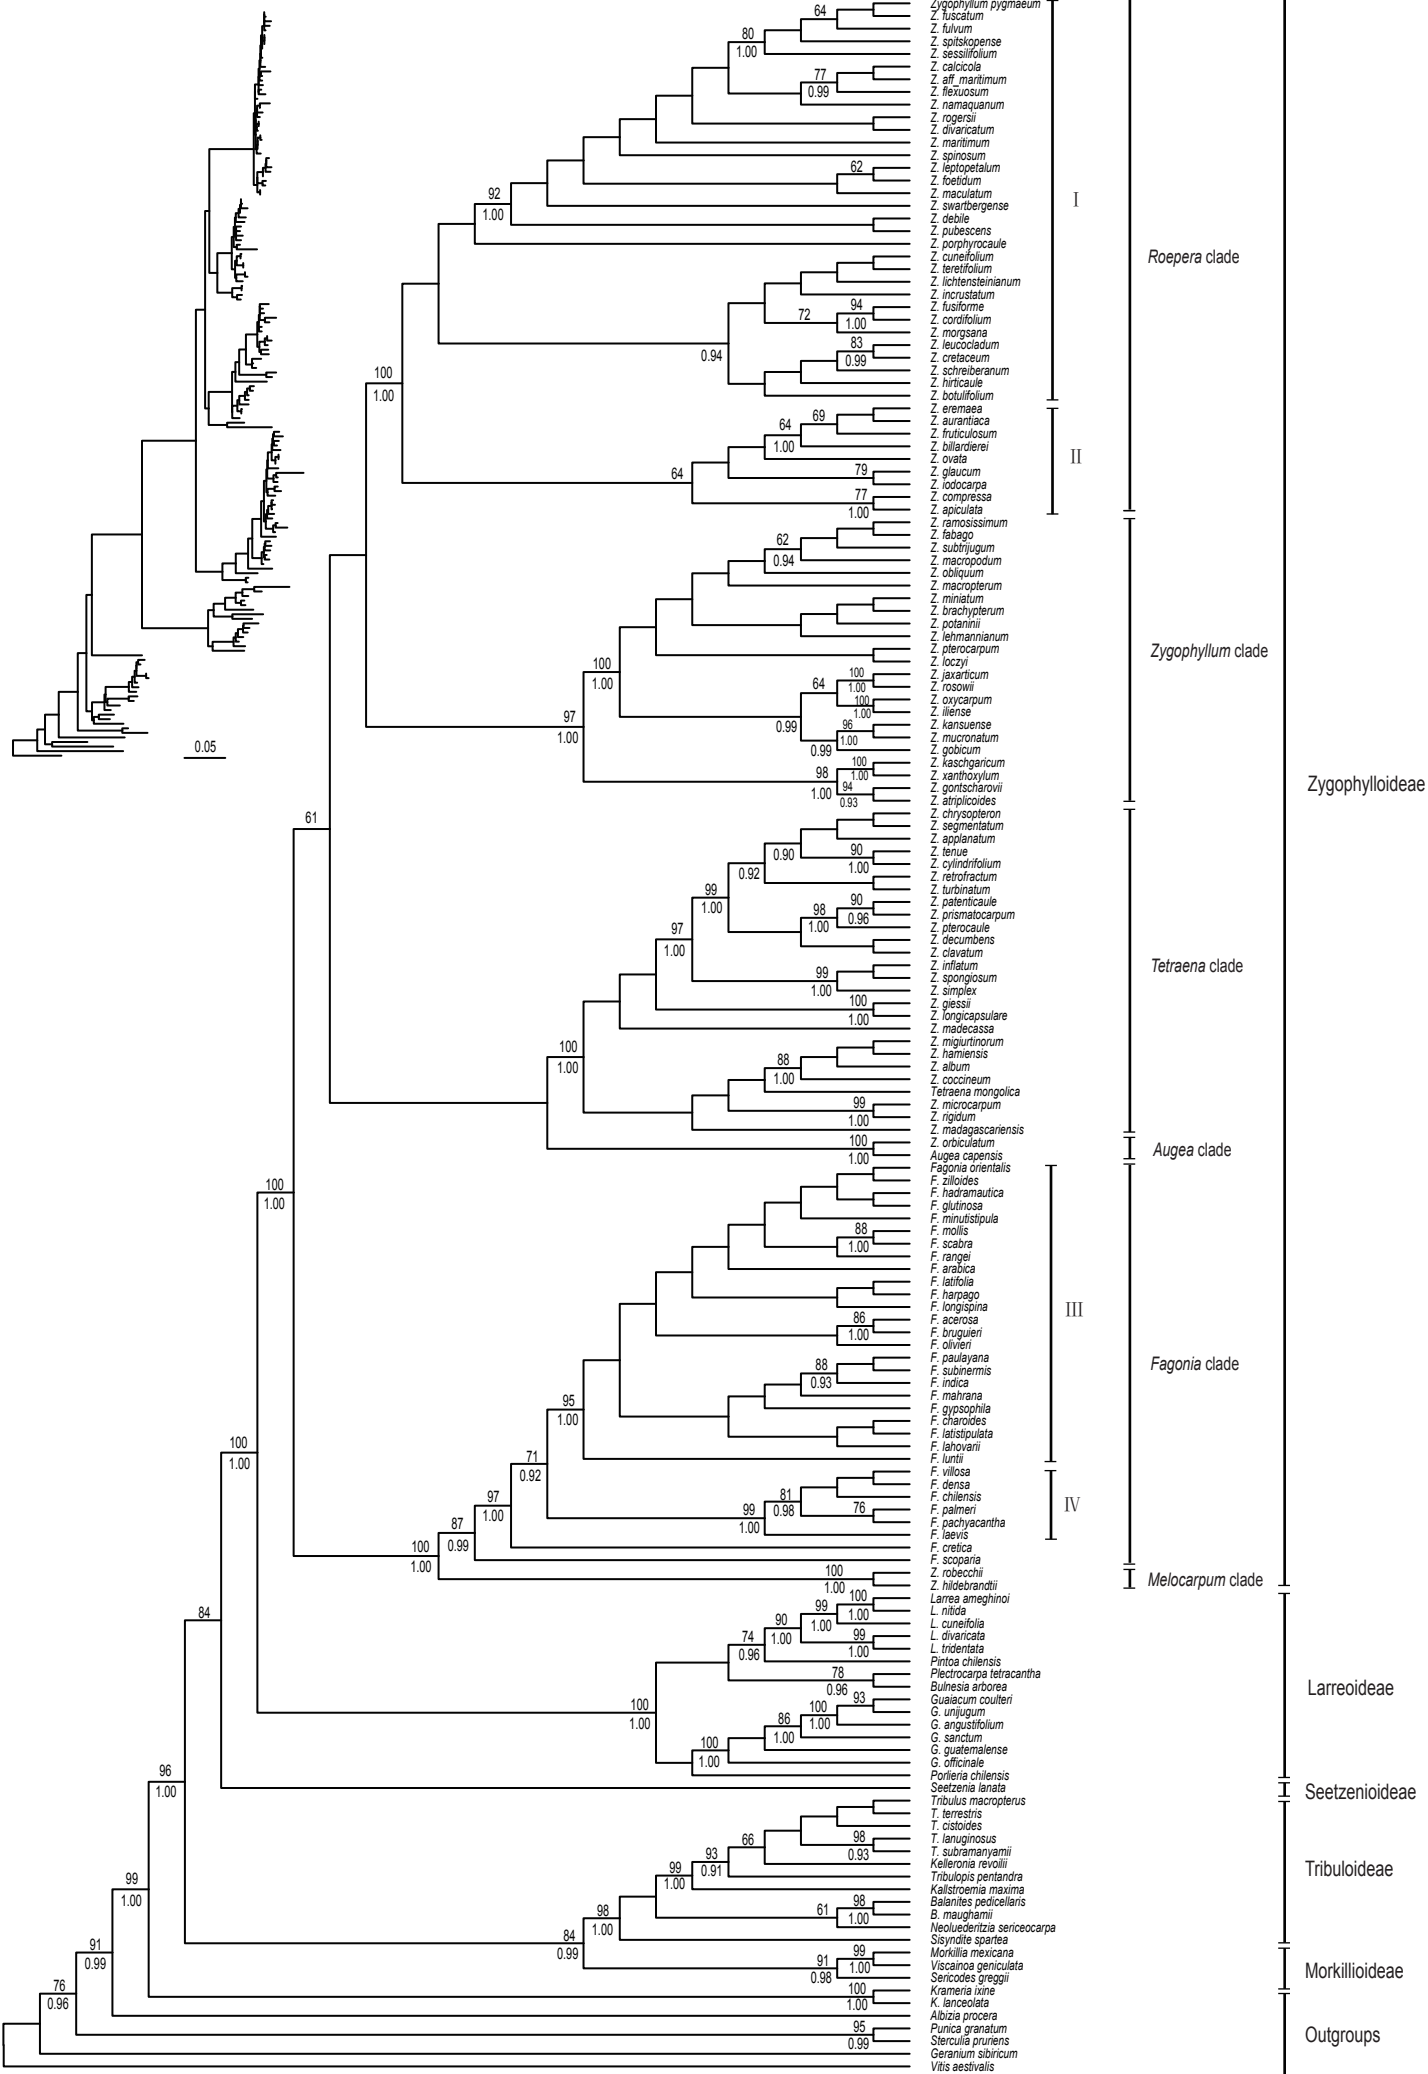

a.

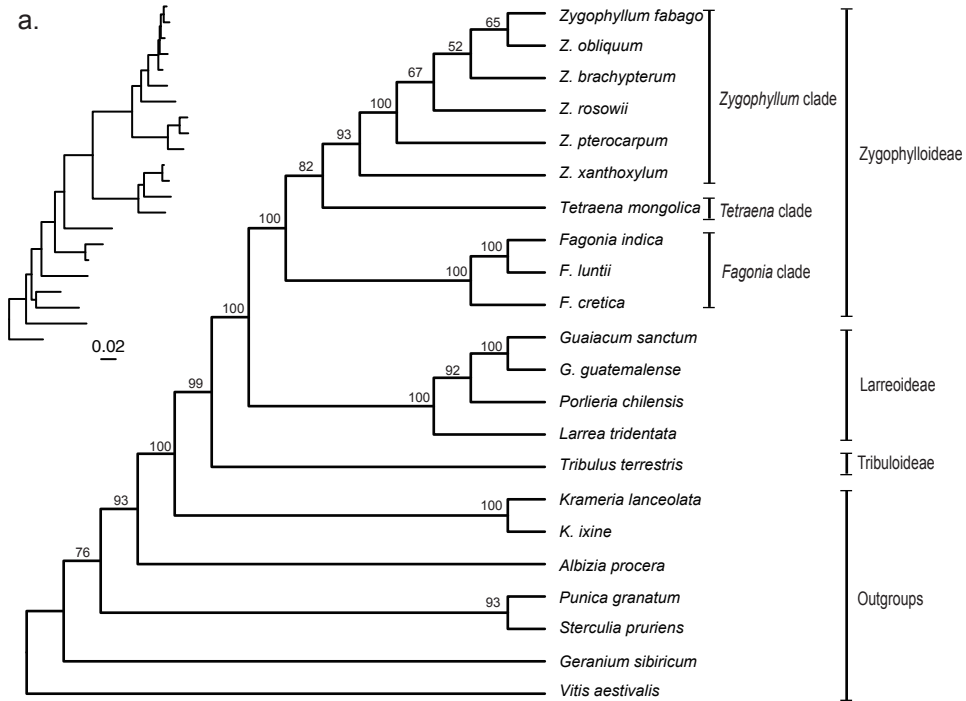

b.

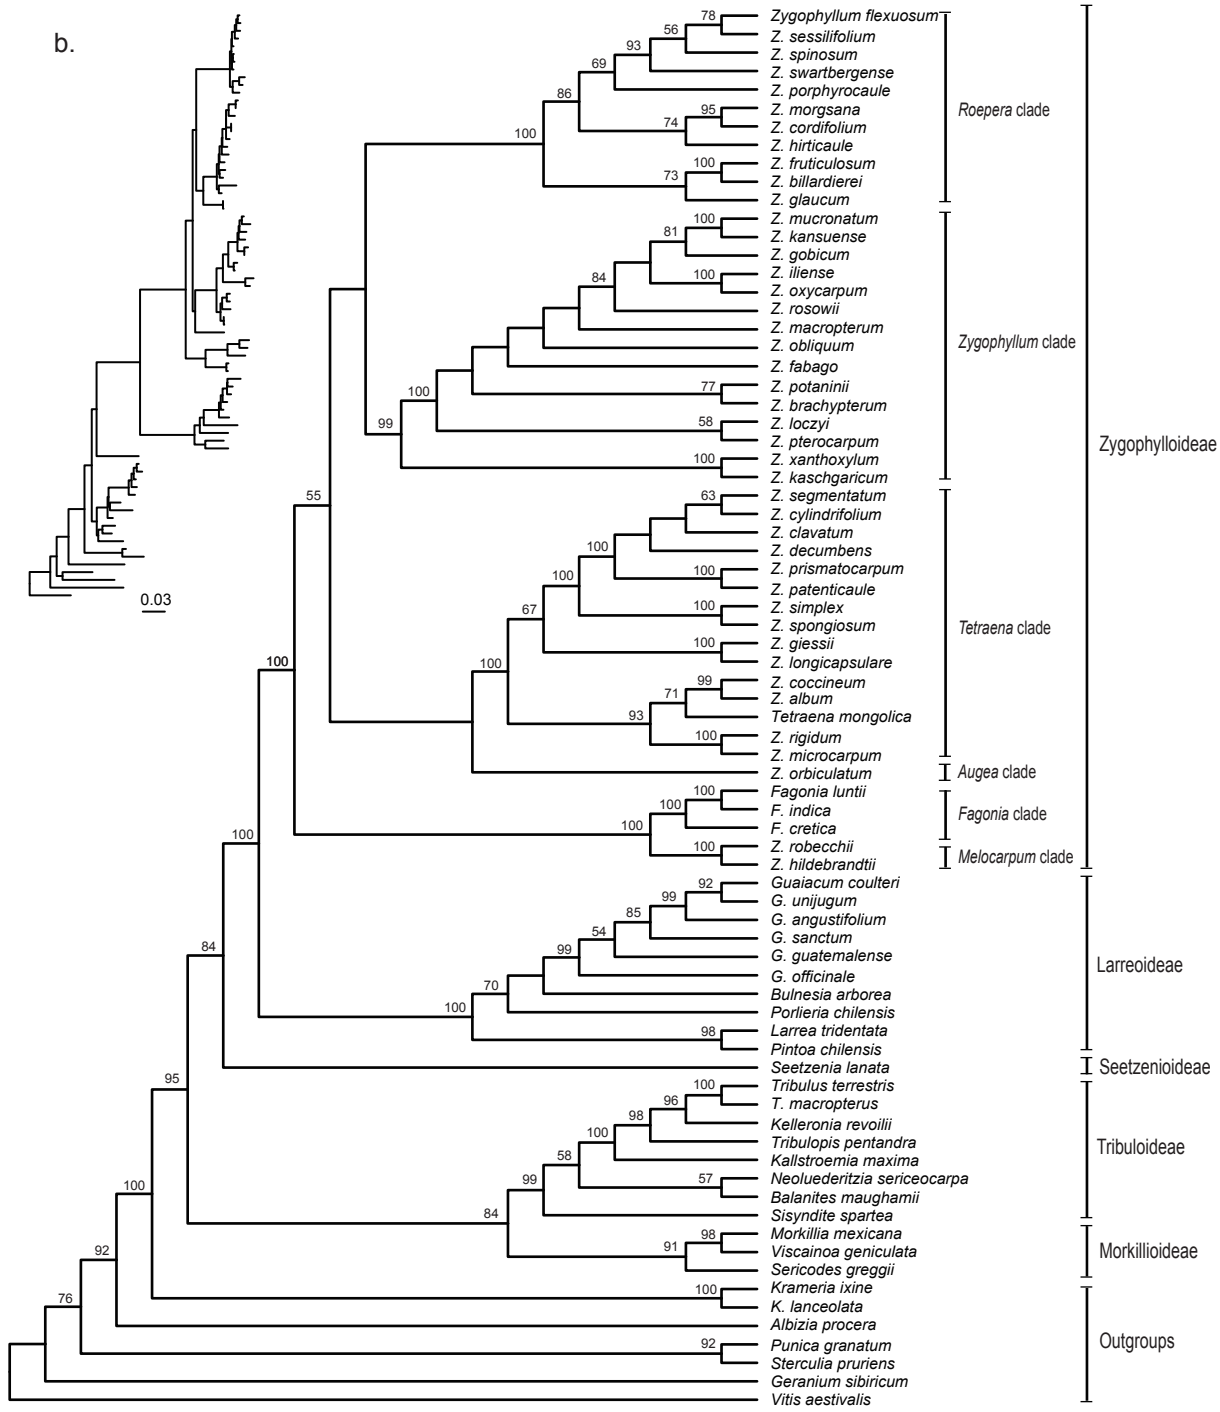

C.

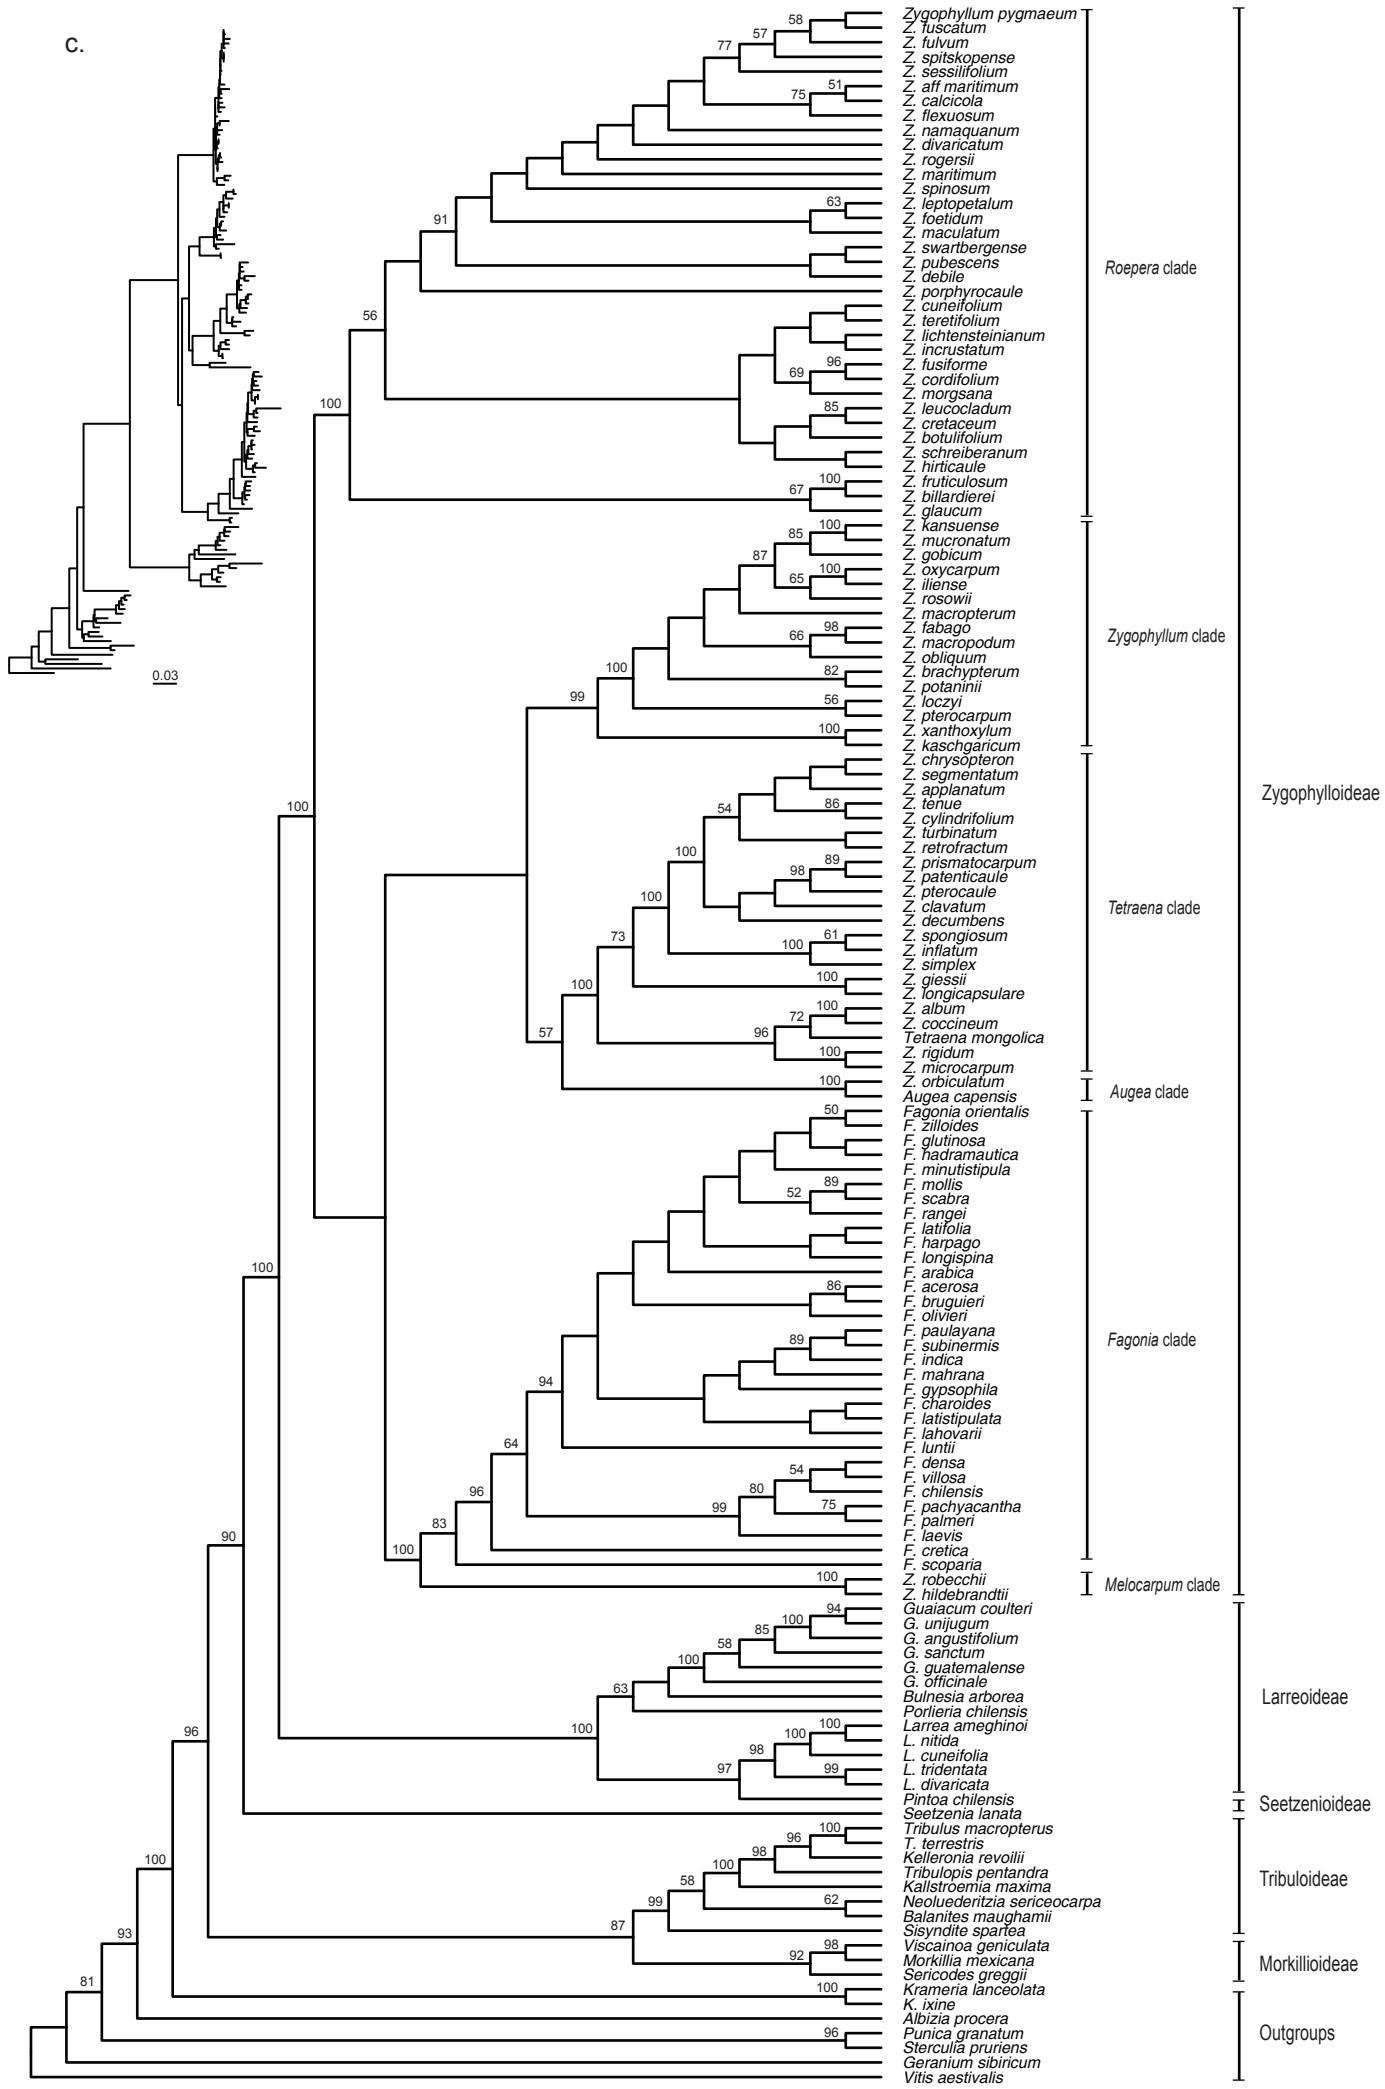

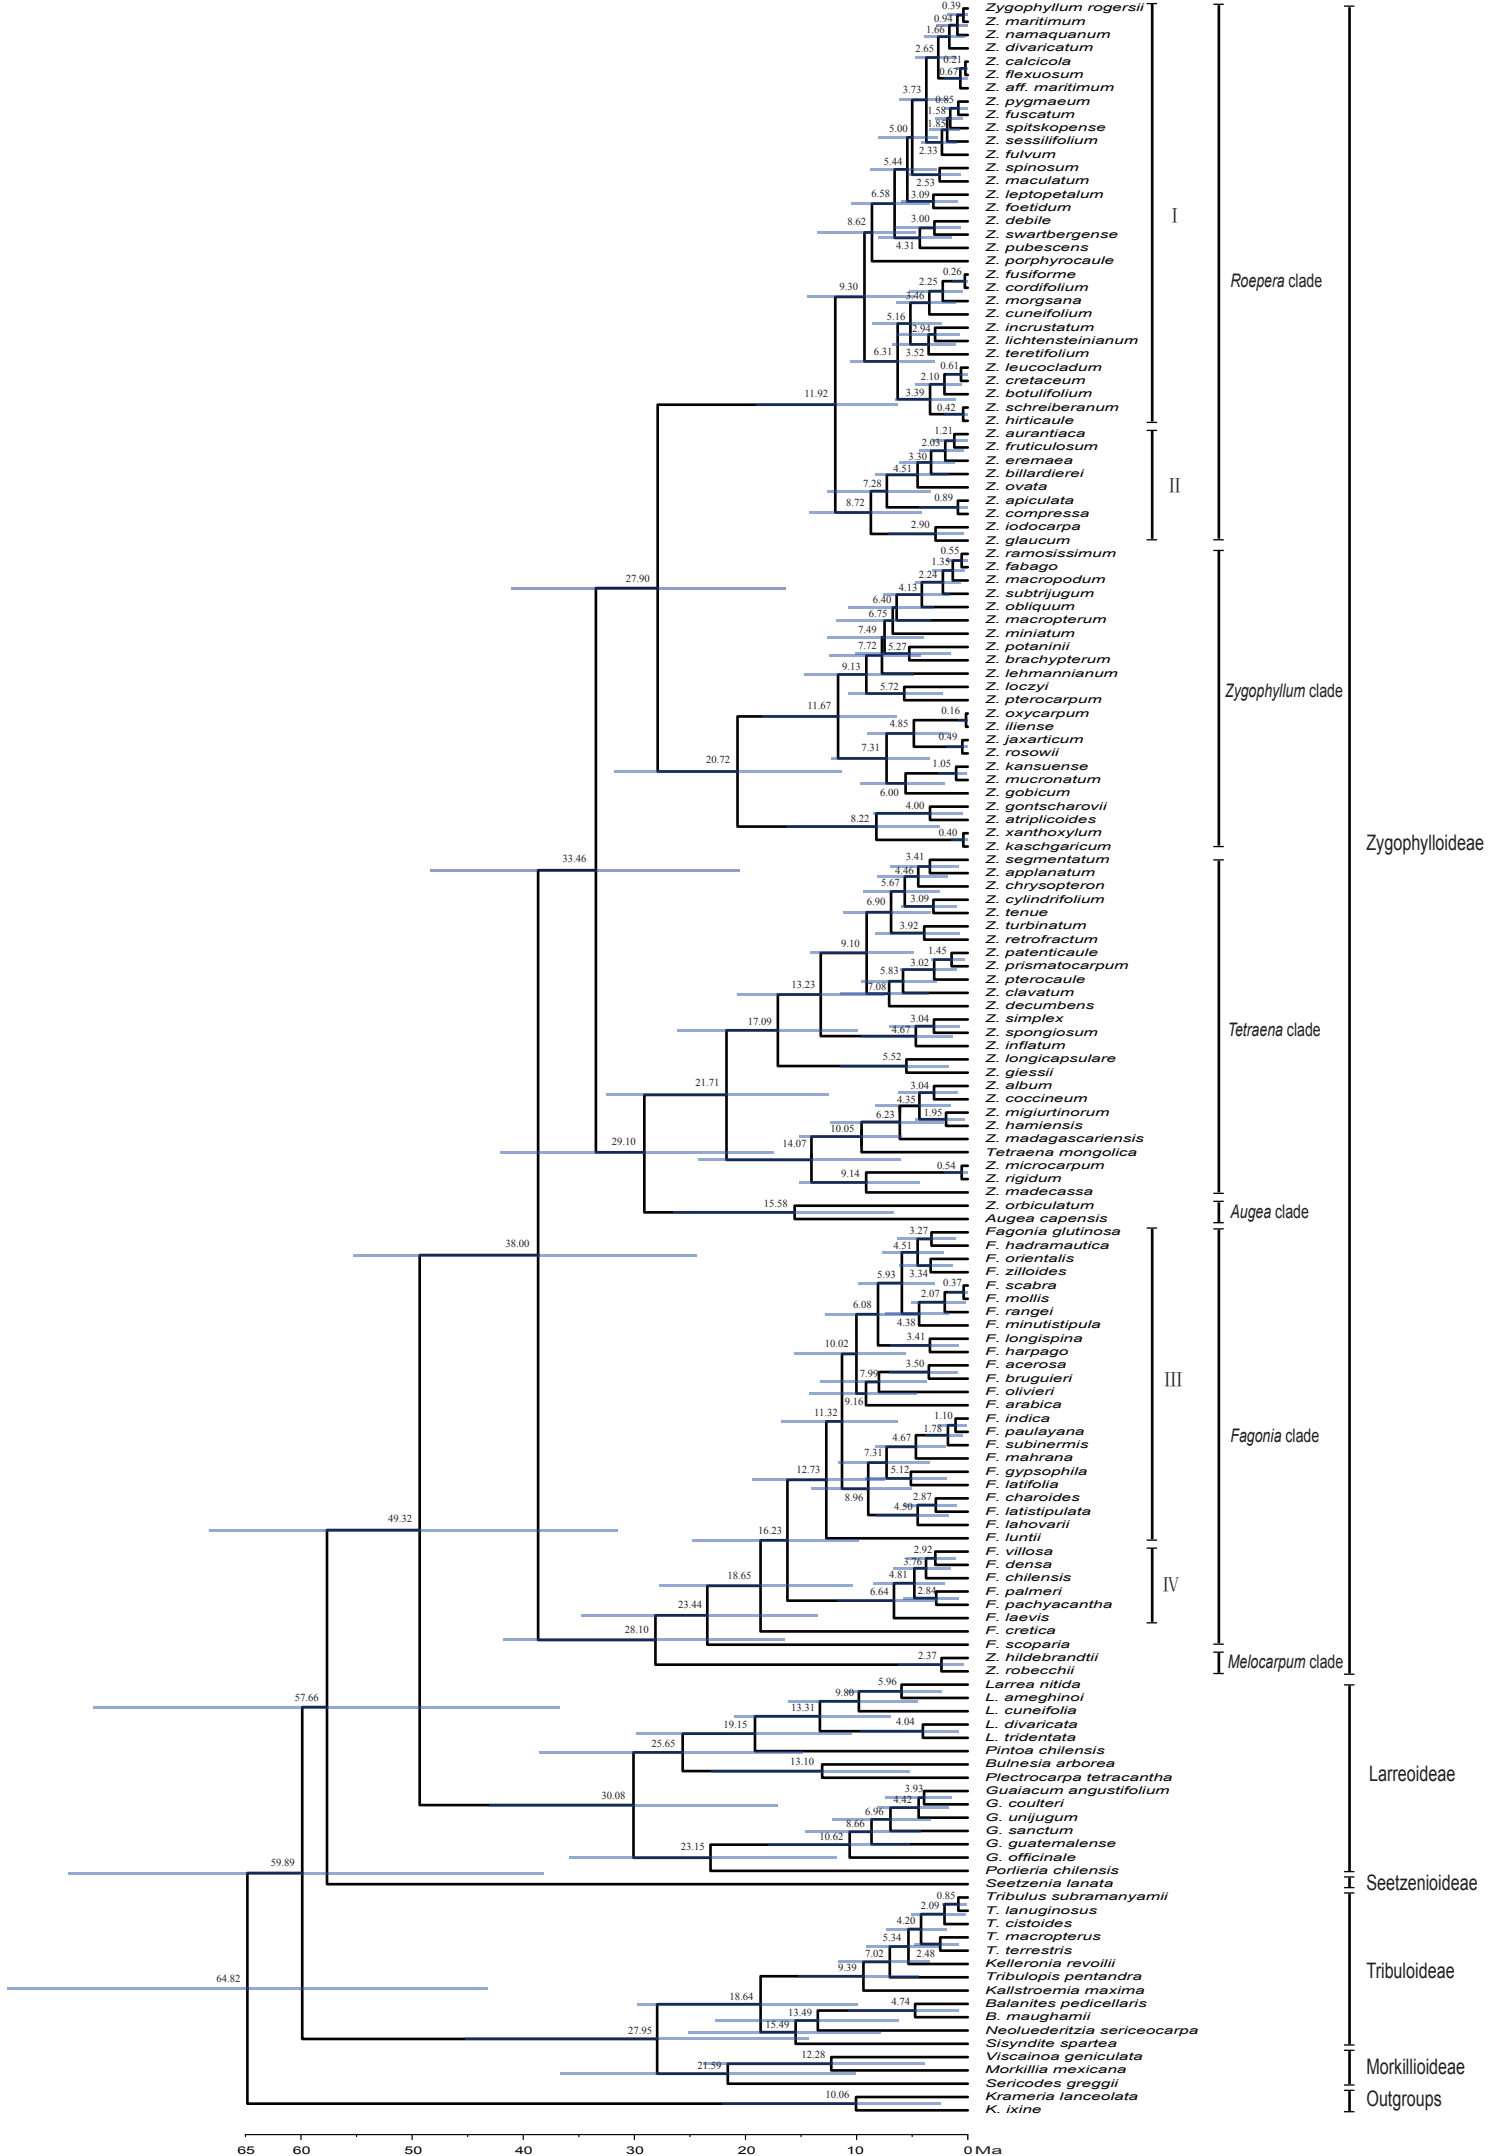

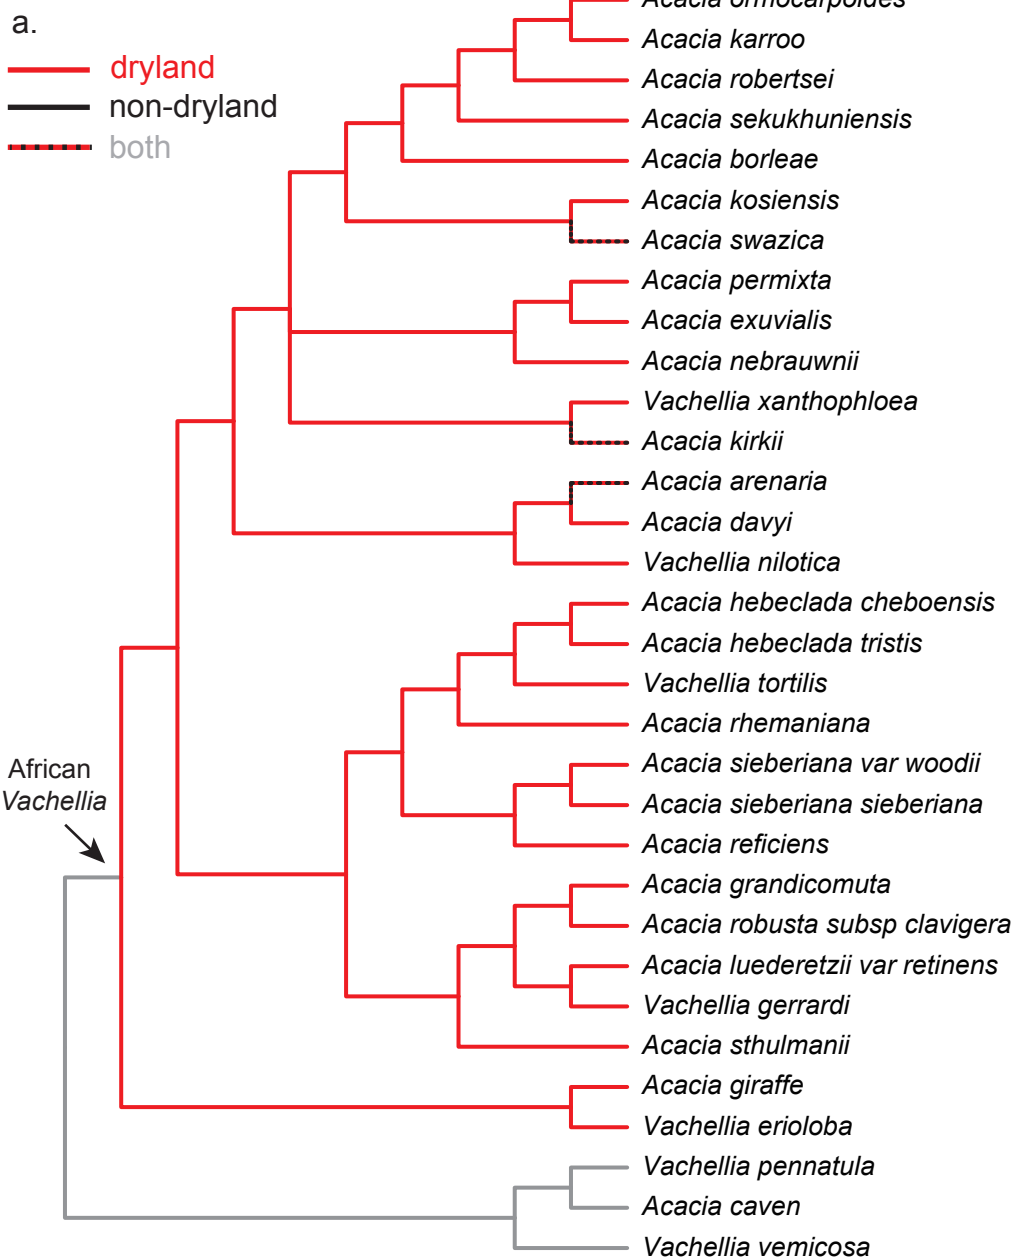

b.

— dryland  
— non-dryland  
- - both

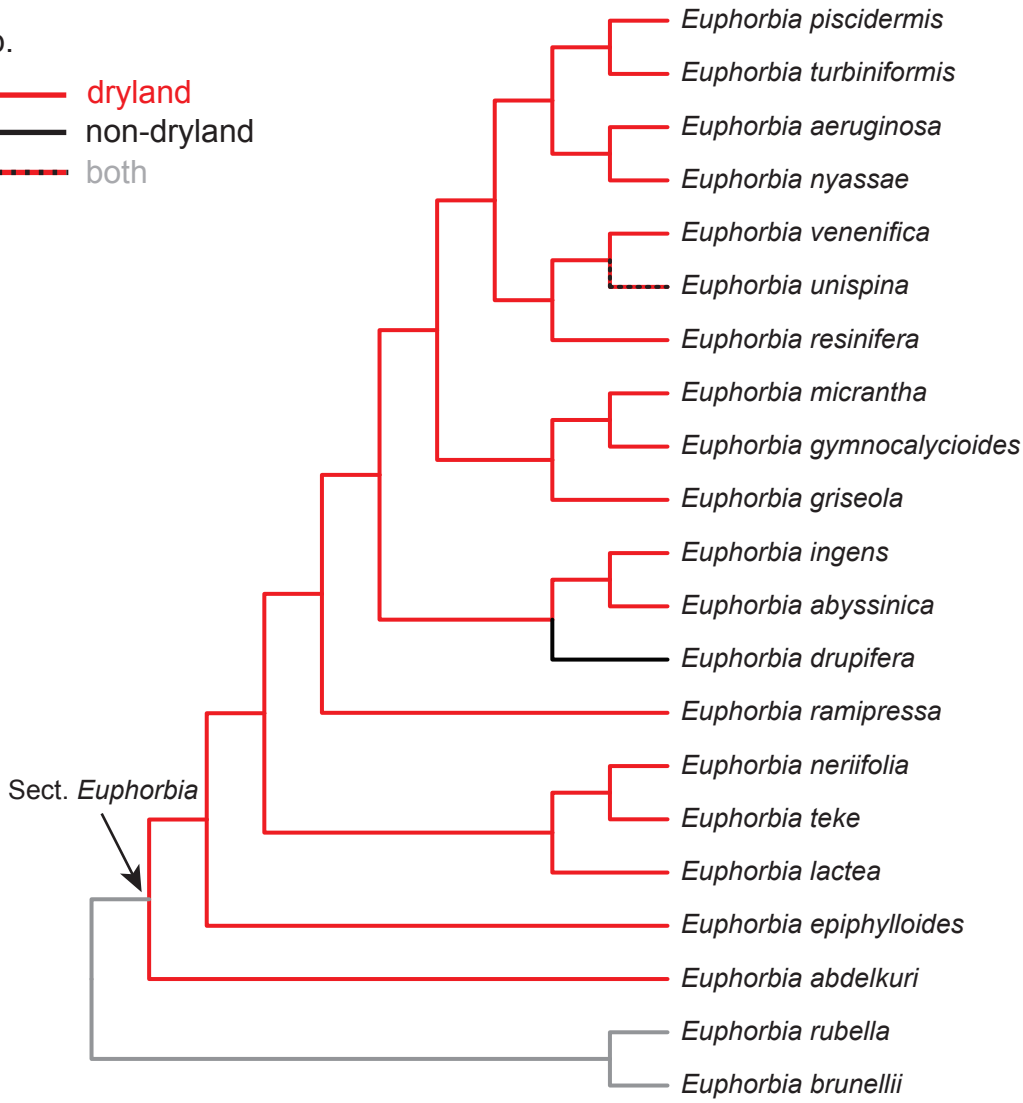



C.

— dryland  
— non-dryland  
- - both

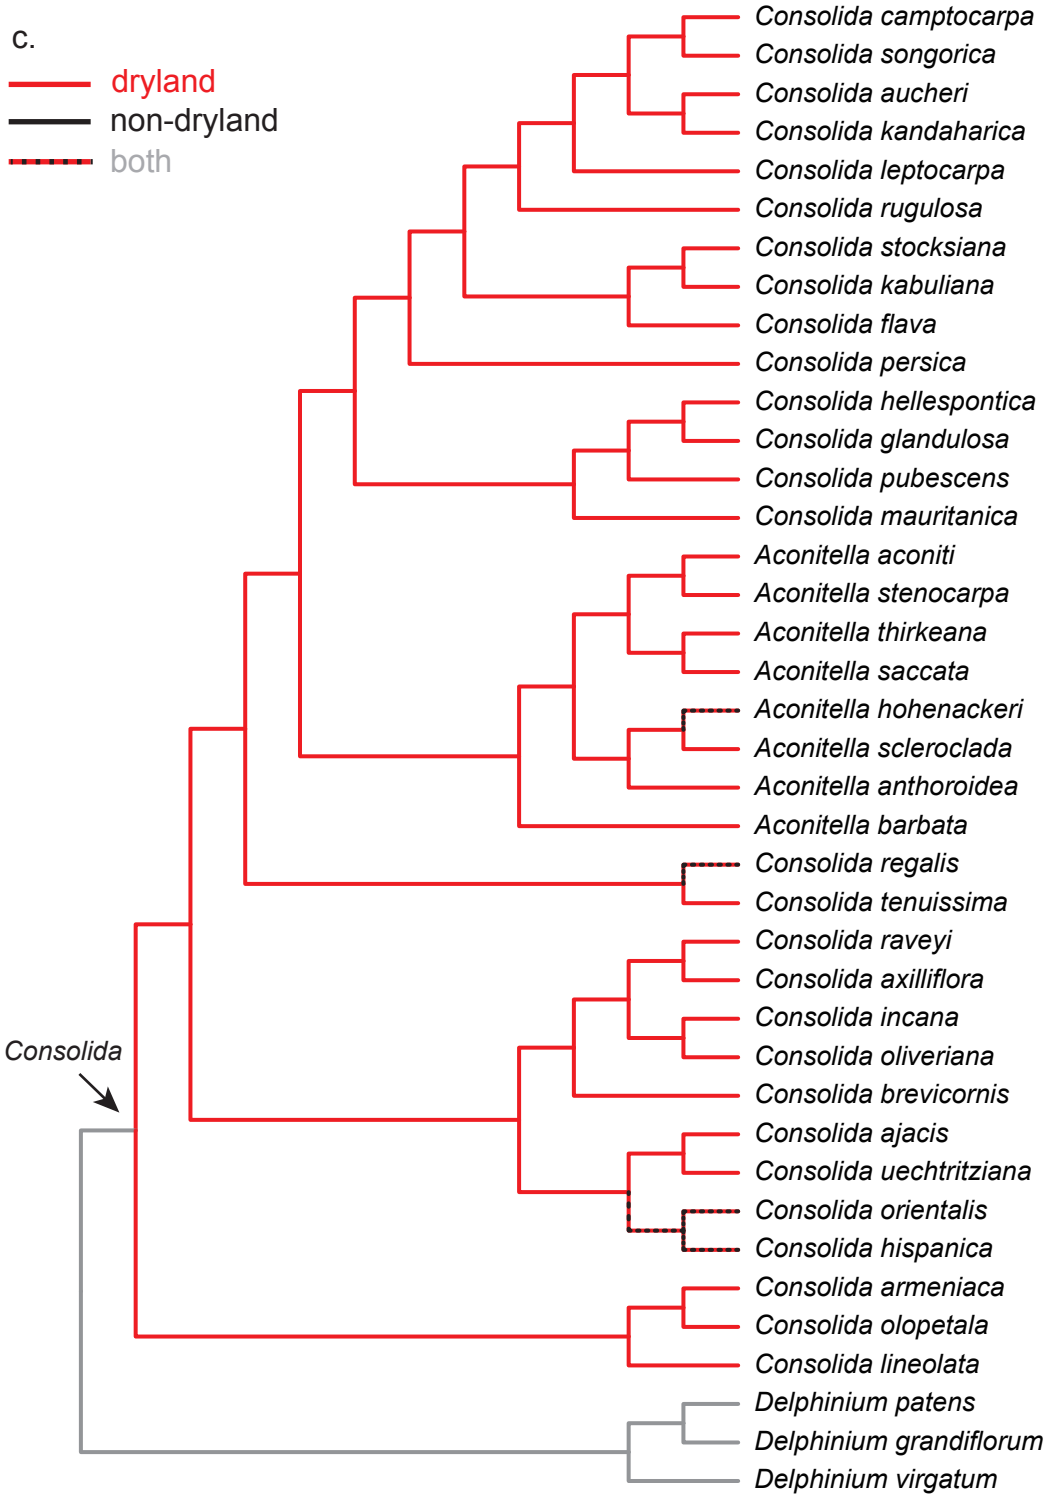

d.

— dryland  
— non-dryland  
- - both

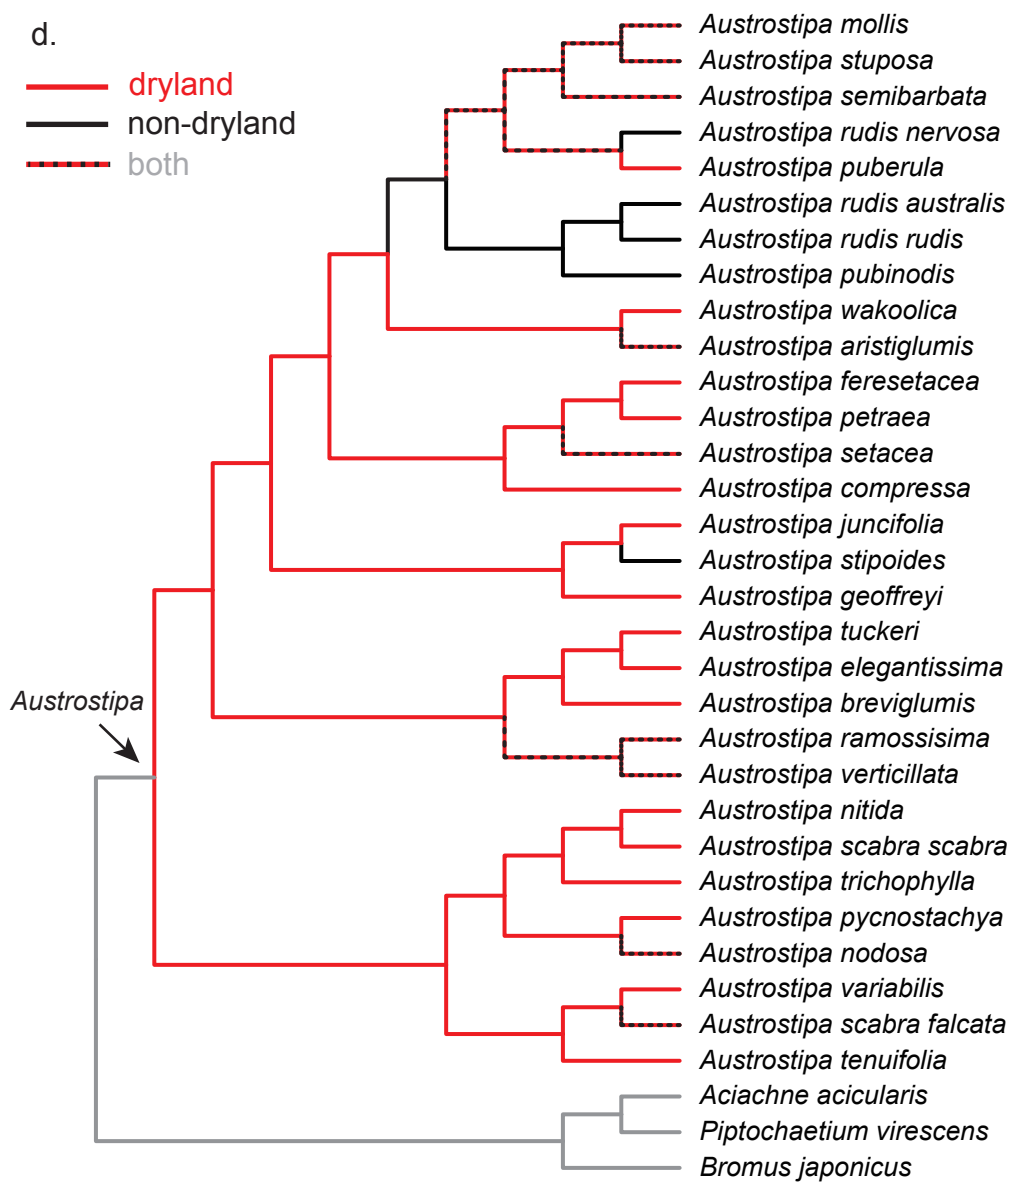

e.

— dryland

— non-dryland

- - both

Subsect. *Hypericifoliae* →

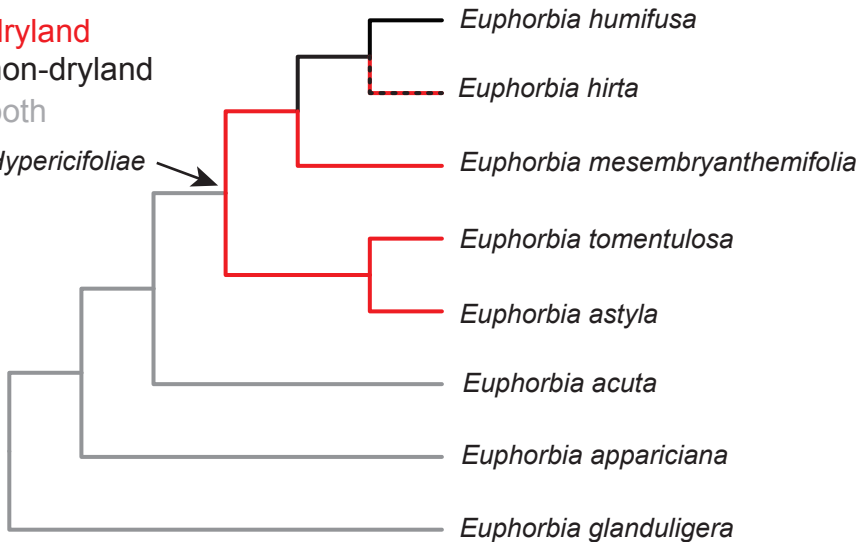

Supplement: 12862_2018_1277_MOESM2_ESM.pdf [file 12862_2018_1277_MOESM2_ESM.pdf]
