# Supplementary material for: Insights into the historical assembly of global dryland floras: the diversification of Zygophyllaceae
Source: PubMed Central journal article supplement (PMC6234786; doi:10.1186/s12862-018-1277-z), 2018-11-09
Supplement: 12862_2018_1277_MOESM1_ESM.pdf [file 12862_2018_1277_MOESM1_ESM.pdf]

### **Additional file 1**

**Table S1** Species, voucher information and GenBank accession numbers for the datasets of four markers.

**Table S2** The parameters of the best-fit model for each DNA region.

**Table S3** The crown group ages and ancestral habitat types of eleven representative plant groups in dryland floras across different continents.

**Table S1**

| Species                                            | Voucher                                                     | <i>rbcL</i>           | <i>trnL</i>           | <i>trnL-F</i>         | ITS                   |
|----------------------------------------------------|-------------------------------------------------------------|-----------------------|-----------------------|-----------------------|-----------------------|
| <i>Zygophyllum album</i> L.f.                      | Thulin <i>et al.</i> 7977 (UPS)                             | AJ133861              | AJ387963              | AJ387963              |                       |
| <i>Zygophyllum aff. maritimum</i> Dold             | Dold 4654 (GRA)                                             |                       | EF656034              | EF656034              |                       |
| <i>Zygophyllum apiculata</i> F. Muell.             | Greder 18664 (K)                                            |                       | AY233384              |                       |                       |
| <i>Zygophyllum applanatum</i> Van Zyl              | Bellstedt 870 (STE)                                         |                       | EF656012              | EF656012              |                       |
| <i>Zygophyllum atriplicoides</i> Fisch. & Mey.     | Astanova s.n. (K)                                           |                       | AY233385              |                       |                       |
| <i>Zygophyllum aurantiacum</i> (Lindl.) F. Muell.  | Greder 20900 (K)                                            |                       | AY300775              |                       |                       |
| <i>Zygophyllum billardierei</i> DC.                | R. 417 (Adelaide B.G.)                                      | AJ133862              | AJ387964              | AJ387964              |                       |
| <i>Zygophyllum botulifolium</i> Van Zyl            | Marais 451 (STE)                                            |                       | EF656026              | EF656026              |                       |
| <i>Zygophyllum brachypterum</i> Kar. & Kir.        | H65 (KUN) <sup>1</sup> ; XJBIZLJ021 (XJBI) <sup>2</sup>     | JF944800 <sup>1</sup> | KR001987 <sup>2</sup> | KR002014 <sup>2</sup> | KR002024 <sup>2</sup> |
| <i>Zygophyllum calcicola</i> Van Zyl               | Dreyer s.n. (STE)                                           |                       | EF656030              | EF656030              |                       |
| <i>Zygophyllum chrysopterum</i> Retief             | Marais 427 (STE)                                            |                       | EF656013              | EF656013              |                       |
| <i>Zygophyllum clavatum</i> Schltr. & Diels        | Bellstedt 878 (STE)                                         | EF655986              | EF656010              | EF656010              |                       |
| <i>Zygophyllum coccineum</i> L.                    | Ryding 1347 (K)                                             | AJ133863              | AJ387965              | AJ387965              |                       |
| <i>Zygophyllum compressa</i> J. M. Black           | Nicholls 809 (K)                                            |                       | AY300776              |                       |                       |
| <i>Zygophyllum cordifolium</i> L. f.               | Marais 446 (STE)                                            | EF655993              | EF656022              | EF656022              |                       |
| <i>Zygophyllum cretaceum</i> Van Zyl               | Bellstedt 856 (STE)                                         |                       | EF656028              | EF656028              |                       |
| <i>Zygophyllum cuneifolium</i> Eckl. & Zeyh.       | Marais 455 (STE)                                            |                       | EF656024              | EF656024              |                       |
| <i>Zygophyllum cylindrifolium</i> Schinz           | Craven 3800 (WIND)                                          | AJ133864              | AJ387966              | AJ387966              |                       |
| <i>Zygophyllum debile</i> Cham.                    | Bellstedt 796 (STE)                                         |                       | EF656041              | EF656041              |                       |
| <i>Zygophyllum decumbens</i> Delile                | Thulin <i>et al.</i> 7981 (UPS)                             | AJ133865              | AJ387967              | AJ387967              |                       |
| <i>Zygophyllum divaricatum</i> Eckl. & Zeyh.       | Dold 4655 (GRA)                                             |                       | EF656031              | EF656031              |                       |
| <i>Zygophyllum eremaea</i> Diels                   | Beier s.n. (UPS)                                            |                       | AY300777              |                       |                       |
| <i>Zygophyllum fabago</i> L.                       | Chase 516 (K) <sup>1</sup> ; XJBIZLJ025 (XJBI) <sup>2</sup> | Y15030 <sup>1</sup>   | KR001984 <sup>2</sup> | KR002011 <sup>2</sup> | KR002029 <sup>2</sup> |
| <i>Zygophyllum flexuosum</i> Eckl. & Zeyh.         | Bellstedt 794 (STE)                                         | EF655995              | EF656032              | EF656032              |                       |
| <i>Zygophyllum foetidum</i> Schrad. & J. C. Wendl. | Marais 423 (STE)                                            |                       | EF656039              | EF656039              |                       |
| <i>Zygophyllum fruticosum</i> DC.                  | Chase 2203 (K)                                              | AJ133866              | AJ387969              | AJ387969              |                       |
| <i>Zygophyllum fulvum</i> L.                       | Van Zyl 4605 (STE)                                          |                       | EF656044              | EF656044              |                       |
| <i>Zygophyllum fuscatum</i> Van Zyl                | Bellstedt 892 (STE)                                         |                       | EF656045              | EF656045              |                       |
| <i>Zygophyllum fusiforme</i> Van Zyl               | Bellstedt 857 (STE)                                         |                       | EF656023              | EF656023              |                       |
| <i>Zygophyllum giessii</i> Merxm. & A. Schreib.    | Bellstedt 874 (STE)                                         | EF655980              | EF656000              | EF656000              |                       |
| <i>Zygophyllum glaucum</i> F. Muell.               | Chase 2204 (K)                                              | AJ133867              | AJ387970              | AJ387970              |                       |
| <i>Zygophyllum gobicum</i> Maxim.                  | XJBIZLJ022 (XJBI)                                           |                       | KR001995              | KR002008              | KR002031              |
| <i>Zygophyllum gontscharovii</i> Boriss.           | Astanova s.n. (K)                                           |                       | AY300787              |                       |                       |
| <i>Zygophyllum hamiense</i> Schweinf.              | Thulin <i>et al.</i> 9840 (UPS)                             |                       | AY300783              |                       |                       |
| <i>Zygophyllum hildebrandtii</i> Engl.             | Thulin <i>et al.</i> 9012 (UPS)                             | AJ133868              | AJ387971              | AJ387971              |                       |
| <i>Zygophyllum hirticaule</i> Van Zyl              | Van Zyl 3894 (STE)                                          | AJ133869              | AJ387973              | AJ387973              |                       |
| <i>Zygophyllum iliense</i> Popov                   | XJBIZLJ023 (XJBI)                                           |                       | KR001993              | KR002006              | KR002032              |
| <i>Zygophyllum incrustatum</i> E. Mey. ex          | Bellstedt 509 (STE)                                         |                       | EF656019              | EF656019              |                       |

## Sond.

|                                                       |                                                              |                       |                       |                       |                       |
|-------------------------------------------------------|--------------------------------------------------------------|-----------------------|-----------------------|-----------------------|-----------------------|
| <i>Zygophyllum inflatum</i> Van Zyl                   | HK 1490 (WIND)                                               |                       | EF656005              | EF656005              |                       |
| <i>Zygophyllum iodocarpum</i> F. Muell.               | Symon 4607 (K)                                               |                       | AY300779              |                       |                       |
| <i>Zygophyllum jaxarticum</i> Popov                   | XJBIZLJ026 (XJBI)                                            |                       |                       |                       | KR002034              |
| <i>Zygophyllum kansuense</i> Y. X. Liou               | XJBIZLJ024 (XJBI)                                            |                       | KR001996              | KR002010              | KR002022              |
| <i>Zygophyllum kaschgaricum</i> Boriss.               | XJBIZLJ012 (XJBI)                                            |                       | KR001981              | KR002000              | KR002018              |
| <i>Zygophyllum lehmannianum</i> Bunge                 | June s.n. 1972 (K)                                           |                       | AY300788              |                       |                       |
| <i>Zygophyllum leptopetalum</i> E. Mey. ex Sond.      | Marais 422 (STE)                                             |                       | EF656040              | EF656040              |                       |
| <i>Zygophyllum leucocladum</i> Diels                  | Van Zyl 4479 (STE)                                           |                       | EF656029              | EF656029              |                       |
| <i>Zygophyllum lichtensteinianum</i> Cham.            | Van Zyl 4594 (STE)                                           |                       | EF656020              | EF656020              |                       |
| <i>Zygophyllum loczyi</i> Kanitz                      | XJBIZLJ019 (XJBI)                                            |                       | KR001988              | KR002015              | KR002021              |
| <i>Zygophyllum longicapsulare</i> Schinz              | Bellstedt 879 (STE)                                          | EF655981              | EF656001              | EF656001              |                       |
| <i>Zygophyllum macropodium</i> Boriss.                | D1508 (KUN) <sup>1</sup> ;<br>XJBIZLJ001 (XJBI) <sup>2</sup> | JF944806 <sup>1</sup> |                       |                       | KR002030 <sup>2</sup> |
| <i>Zygophyllum macropterum</i> C. A. Mey.             | XJBIZLJ017 (XJBI)                                            |                       | KR001991              | KR002003              | KR002026              |
| <i>Zygophyllum maculatum</i> Aiton                    | Marais 433 (STE)                                             |                       | EF656033              | EF656033              |                       |
| <i>Zygophyllum madagascariensis</i> (Baill.) Stauffer | Keating Miller 2236 (K)                                      |                       | AY300784              |                       |                       |
| <i>Zygophyllum madecassum</i> H. Perrier              | Lorence s.n. (K)                                             |                       | AY300785              |                       |                       |
| <i>Zygophyllum maritimum</i> Eckl. & Zeyh.            | Dold 4656 (GRA)                                              |                       | EF656035              | EF656035              |                       |
| <i>Zygophyllum microcarpum</i> E. Mey.                | Van Zyl 4591 (STE)                                           | EF655983              | EF656002              | EF656002              |                       |
| <i>Zygophyllum migiurtinorum</i> Chiov.               | Thulin <i>et al.</i> 9553 (UPS)                              |                       | AY300786              |                       |                       |
| <i>Zygophyllum miniatum</i> Cham.                     | June s.n. 1965 (K)                                           |                       | AY300789              |                       |                       |
| <i>Zygophyllum morgsana</i> L.                        | Bellstedt 890 (STE)                                          | EF655994              | EF656021              | EF656021              |                       |
| <i>Zygophyllum mucronatum</i> Maxim.                  | XJBIZLJ030 (XJBI)                                            |                       | KR001997              | KR002009              | KR002023              |
| <i>Zygophyllum namaquanum</i> Van Zyl                 | Marais 440 (STE)                                             |                       | EF656036              | EF656036              |                       |
| <i>Zygophyllum obliquum</i> Popov                     | H67 (KUN) <sup>1</sup> ; XJBIZLJ028 (XJBI) <sup>2</sup>      | JF944808 <sup>1</sup> | KR001989 <sup>2</sup> | KR002002 <sup>2</sup> | KR002028 <sup>2</sup> |
| <i>Zygophyllum orbiculatum</i> Welw. ex Oliv.         | Craven 5096 (WIND)                                           | EF655979              | EF655999              | EF655999              |                       |
| <i>Zygophyllum ovatum</i> Ewart & J. White            | Melville 451 (K)                                             |                       | AY300782              |                       |                       |
| <i>Zygophyllum oxycarpum</i> Popov                    | XJBIZLJ031 (XJBI)                                            |                       | KR001992              | KR002007              | KR002033              |
| <i>Zygophyllum patenicaule</i> Van Zyl                | Bellstedt 868 (STE)                                          | EF655989              | EF656008              | EF656008              |                       |
| <i>Zygophyllum porphyrocaule</i> Van Zyl              | Bellstedt 800 (STE)                                          | EF655992              | EF656018              | EF656018              |                       |
| <i>Zygophyllum potaninii</i> Maxim.                   | XJBIZLJ020 (XJBI)                                            |                       | KR001986              | KR002013              | KR002020              |
| <i>Zygophyllum prismatocarpum</i> Sond.               | Bellstedt 860 (STE)                                          | EF655990              | EF656009              | EF656009              |                       |
| <i>Zygophyllum pterocarpum</i> Bunge                  | H64 (KUN) <sup>1</sup> ; XJBIZLJ016 (XJBI) <sup>2</sup>      | JF944809 <sup>1</sup> | KR001985 <sup>2</sup> | KR002012 <sup>2</sup> | KR002025 <sup>2</sup> |
| <i>Zygophyllum pterocaule</i> Van Zyl                 | Mucina 270806/25 (STE)                                       |                       | EF656007              | EF656007              |                       |
| <i>Zygophyllum pubescens</i> Schinz                   | Bellstedt 881 (STE)                                          |                       | EF656042              | EF656042              |                       |
| <i>Zygophyllum pygmaeum</i> Eckl. & Zeyh.             | Marais 424 (STE)                                             |                       | EF656046              | EF656046              |                       |
| <i>Zygophyllum ramosissimum</i> Popov                 | Granitov s.n. (K)                                            |                       | AY300790              |                       |                       |
| <i>Zygophyllum retrofractum</i> Thunb.                | Marais 430 (STE)                                             |                       | EF656014              | EF656014              |                       |
| <i>Zygophyllum rigidum</i> Schinz                     | Van Zyl 4590 (STE)                                           | EF655982              | EF656003              | EF656003              |                       |
| <i>Zygophyllum robecchii</i> Engl.                    | Chase 636 (K)                                                | AJ133870              | AJ387972              | AJ387972              |                       |

|                                                 |                                                              |                       |                       |                       |                       |
|-------------------------------------------------|--------------------------------------------------------------|-----------------------|-----------------------|-----------------------|-----------------------|
| <i>Zygophyllum rogersii</i> Compton             | Marais 432 (STE)                                             |                       | EF656037              | EF656037              |                       |
| <i>Zygophyllum rosowii</i> Bunge                | H62 (KUN) <sup>1</sup> ; XJBIZLJ027 (XJBI) <sup>2</sup>      | JF944811 <sup>1</sup> | KR001994 <sup>2</sup> | KR002005 <sup>2</sup> | KR002035 <sup>2</sup> |
| <i>Zygophyllum schreiberanum</i> Merxm. & Giess | Bellstedt 871 (STE)                                          |                       | EF656027              | EF656027              |                       |
| <i>Zygophyllum segmentatum</i> Van Zyl          | Bellstedt 861 (STE)                                          | EF655987              | EF656015              | EF656015              |                       |
| <i>Zygophyllum sessilifolium</i> L.             | Marais 434 (STE)                                             | EF655997              | EF656047              | EF656047              |                       |
| <i>Zygophyllum simplex</i> L.                   | Chase 806 (K)                                                | Y15031                | AJ387974              | AJ387974              |                       |
| <i>Zygophyllum spinosum</i> L.                  | Bellstedt 801 (STE)                                          | AJ133871              | EF656038              | EF656038              |                       |
| <i>Zygophyllum spitskopense</i> Van Zyl         | Van Zyl 4606 (STE)                                           |                       | EF656048              | EF656048              |                       |
| <i>Zygophyllum spongiosum</i> Van Zyl           | HK 1573 (WIND)                                               | EF655985              | EF656006              | EF656006              |                       |
| <i>Zygophyllum subtrijugum</i> C. A. Mey.       | 1955.07.30 s. leg. s.n. (K)                                  |                       | AY300792              |                       |                       |
| <i>Zygophyllum swartbergense</i> Van Zyl        | Bellstedt 798 (STE)                                          | EF655996              | EF656043              | EF656043              |                       |
| <i>Zygophyllum tenue</i> R. Glover              | Van Zyl 4593 (STE)                                           |                       | EF656017              | EF656017              |                       |
| <i>Zygophyllum teretifolium</i> Schltr.         | Marais 447 (STE)                                             |                       | EF656025              | EF656025              |                       |
| <i>Zygophyllum turbinatum</i> Van Zyl           | Bellstedt 799 (STE)                                          |                       | EF656016              | EF656016              |                       |
| <i>Zygophyllum xanthoxylum</i> (Bunge) Maxim.   | Chase 1700 (K) <sup>1</sup> ; XJBIZLJ013 (XJBI) <sup>2</sup> | AJ133872 <sup>1</sup> | KR001982 <sup>2</sup> | KR002001 <sup>2</sup> | KR002019 <sup>2</sup> |
| <i>Fagonia acerosa</i> Boiss.                   | Davis 56261 (E)                                              |                       | AY641579              |                       | AY641617              |
| <i>Fagonia arabica</i> L.                       | Leonard 4887 (S)                                             |                       | AY641580              |                       | AY641618              |
| <i>Fagonia bruguieri</i> DC.                    | Thulin <i>et al.</i> 9986 (UPS)                              |                       | AY641582              |                       | AY641619              |
| <i>Fagonia charoides</i> Chiov.                 | Thulin <i>et al.</i> 10587 (UPS)                             |                       | AY641583              |                       |                       |
| <i>Fagonia chilensis</i> Hook. & Arn.           | Penailillo s.n. (UTALCA)                                     |                       | AY641584              |                       | AY641622              |
| <i>Fagonia cretica</i> L.                       | Chase 3432 (K) <sup>1</sup>                                  | AJ133855 <sup>1</sup> | AJ387942 <sup>1</sup> | AJ387942 <sup>1</sup> |                       |
| <i>Fagonia densa</i> I. M. Johnst.              | Rebman 3171 (SD)                                             |                       | AY641587              |                       | AY641625              |
| <i>Fagonia glutinosa</i> Delile                 | Davis 49654 (K)                                              |                       | AY641588              |                       | AY641627              |
| <i>Fagonia gypsophila</i> Beier & Thulin        | Thulin <i>et al.</i> 9473 (UPS)                              |                       | AY641589              |                       | AY641626              |
| <i>Fagonia hadramautica</i> Beier & Thulin      | Thulin <i>et al.</i> 9808 (UPS)                              |                       | AY641590              |                       | AY641628              |
| <i>Fagonia harpago</i> Emb. & Maire             | Podlech 40630 (RSA)                                          |                       | AY641591              |                       | AY641629              |
| <i>Fagonia indica</i> Burm. f.                  | Thulin <i>et al.</i> 9835 (UPS)                              | Y15018                | AY300769              | AJ387943              | AY641630              |
| <i>Fagonia laevis</i> Standl.                   | Beier 97 (UPS)                                               |                       | AY641595              |                       | AY641633              |
| <i>Fagonia lahovarii</i> Volkens & Schweinf.    | Thulin <i>et al.</i> 9522 (UPS)                              |                       | AY641596              |                       | AY641635              |
| <i>Fagonia latifolia</i> Delile                 | Scholz 174 (B)                                               |                       | AY641597              |                       |                       |
| <i>Fagonia latistipulata</i> Beier & Thulin     | Thulin <i>et al.</i> 10833 (UPS)                             |                       | AY641598              |                       | AY641636              |
| <i>Fagonia longispina</i> Batt.                 | Podlech 53369 (M)                                            |                       | AY641599              |                       | AY641637              |
| <i>Fagonia luntii</i> Baker                     | Thulin <i>et al.</i> 9881 (UPS)                              | AJ133856              | AJ387944              | AJ387944              | AY641638              |
| <i>Fagonia mahrana</i> Beier                    | Thulin <i>et al.</i> 9682 (UPS)                              |                       | AY641600              |                       | AY641639              |
| <i>Fagonia minutistipula</i> Engl.              | Giess and Müller 13952 (K)                                   |                       | AY300771              |                       | AY641641              |
| <i>Fagonia mollis</i> Delile                    | Townsend 86/12 (K)                                           |                       | AY641601              |                       |                       |
| <i>Fagonia olivieri</i> DC.                     | Samuelsson 4357 (S)                                          |                       | AY641602              |                       | AY641646              |
| <i>Fagonia orientalis</i> C. Presl              | Collenette 7516 (E)                                          |                       | AY641603              |                       | AY641648              |
| <i>Fagonia pachyacantha</i> Rydb.               | Beier 93 (UPS)                                               |                       | AY641604              |                       | AY641649              |
| <i>Fagonia palmeri</i> Vasey & Rose             | Hastings 75 (SD)                                             |                       | AY641605              |                       | AY641653              |
| <i>Fagonia paulayana</i> J. Wagner & Vierh.     | Thulin <i>et al.</i> 9515 (UPS)                              |                       | AY641608              |                       | AY641654              |

|                                                              |                                                                  |                     |                                                                   |
|--------------------------------------------------------------|------------------------------------------------------------------|---------------------|-------------------------------------------------------------------|
| <i>Fagonia rangei</i> Loes. ex Engl.                         | Leistner 3388 (K)                                                | AY641609            | AY641647                                                          |
| <i>Fagonia scabra</i> Forssk.                                | Davis 49662 (E)                                                  | AY300768            |                                                                   |
| <i>Fagonia scoparia</i> Brandegee                            | Johnston 9461 (SD)                                               | AY300773            | AY641644                                                          |
| <i>Fagonia subinermis</i> Boiss.                             | Grey-Wilson & Hewer 285 (W)                                      | AY641610            | AY641642                                                          |
| <i>Fagonia villosa</i> D. M. Porter                          | K. 5915 (RSA)                                                    | AY641611            | AY641640                                                          |
| <i>Fagonia zilloides</i> Humbert                             | Davis 49047 (E)                                                  | AY641612            | AY641655                                                          |
| <i>Augea capensis</i> Thunb.                                 | Bellstedt 934 (STE)                                              | EF655978            | EF655998                                                          |
| <i>Tetraena mongolica</i> Maxim.                             | Sheahan 1994 (K) <sup>1</sup> ; XJBIZLJ015 (XJBI) <sup>2</sup>   | Y15027 <sup>1</sup> | KR001983 <sup>2</sup> KR001999 <sup>2</sup> KR002017 <sup>2</sup> |
| <i>Bulnesia arborea</i> (Jacq.) DC.                          | Chase 641 (K)                                                    | EU644676            | AJ387947 AJ387947                                                 |
| <i>Guaiacum angustifolium</i> Engelm.                        | J. R. Dertien 534 (DEK)                                          | EU253465            | EU253465 JX486127                                                 |
| <i>Guaiacum coulteri</i> A. Gray                             | L. Lopez & M. Martinez 196 (DEK)                                 | EU253466            | EU253466 JX486715                                                 |
| <i>Guaiacum guatemalense</i> Planch. ex Rydb. & Vail         | Chase 640 (K)                                                    | Y15019              | AJ387948 AJ387948 JX486717                                        |
| <i>Guaiacum officinale</i> L.                                | J.R. Dertien 505 (DEK)                                           | EU253467            | EU253467 JX901024                                                 |
| <i>Guaiacum sanctum</i> L.                                   | L. Lopez & M. Martinez 204 (DEK)                                 | JQ594515            | EU253458 EU253461 JX486719                                        |
| <i>Guaiacum unijugum</i> Brandegee                           | R. McCauley s.n. (DEK)                                           | JX682629            | JX682629 JX486721                                                 |
| <i>Porlieria chilensis</i> I.M. Johnst                       | Chase 643 (K)                                                    | Y15024              | AJ387955 AJ387955 JX901026                                        |
| <i>Larrea ameghinoi</i> Speg.                                | J.H.H.13246 (SI)                                                 | AF333329            | AF334825                                                          |
| <i>Larrea cuneifolia</i> Cav.                                | CUNE                                                             | AF200471            | JF267296                                                          |
| <i>Larrea divaricata</i> Cav.                                | J.H.H.9886 (SI)                                                  | AF200472            | AF334821                                                          |
| <i>Larrea nitida</i> Cav.                                    | J.H.H.13240 (SI)                                                 | AF200473            | AF334823                                                          |
| <i>Larrea tridentata</i> (Sessé & Moc. ex DC.) Coville       | Chase 636 (K) <sup>1</sup> ; R. Laport 766242 (RSA) <sup>2</sup> | AY935748            | AJ387951 <sup>1</sup> AJ387951 <sup>1</sup> JF267306 <sup>2</sup> |
| <i>Pintoa chilensis</i> Gay                                  | Teillier 859 (NY)                                                | AJ133858            | AJ387954 AJ387954                                                 |
| <i>Plectrocarpa tetraacantha</i> Gillies ex Hook. & Arn.     | J. H. Hunziker and V. Lia 13269                                  | AF333330            |                                                                   |
| <i>Seetzenia lanata</i> (Willd.) Bullock                     | Herman 3964 (K)                                                  | Y15025              | AJ387956 AJ387956                                                 |
| <i>Tribulopsis pentandra</i> R.Br.                           | Wilson 4719 (NSW)                                                | AJ133860            | AJ387960 AJ387960                                                 |
| <i>Tribulus cistoides</i> L.                                 | J.R. Abbott 24857 (FLAS)                                         | GU135188            |                                                                   |
| <i>Tribulus lanuginosus</i> L.                               | Sathishkumar <i>et al.</i> (2010, unpublished)                   |                     | HM236860                                                          |
| <i>Tribulus macropterus</i> Boiss                            | Collenette 3/93 (K)                                              | Y15028              | AJ387961 AJ387961                                                 |
| <i>Tribulus subramanyamii</i> P. Singh, G.S. Giri & V. Singh | Sathishkumar <i>et al.</i> (2010, unpublished)                   |                     | HM236858                                                          |
| <i>Tribulus terrestris</i> L.                                | XJBIZLJ014 (XJBI)                                                | AM235167            | KR001980 KR001998 KR002016                                        |
| <i>Kallstroemia maxima</i> (L.) Hook. & Arn.                 | Magellanes 3806 (K)                                              | Y15020              | AJ387949 AJ387949                                                 |
| <i>Kelleronia revoilii</i>                                   | Barbier s.n. (K)                                                 | Y15021              | AJ387950 AJ387950                                                 |
| <i>Sisymbrium sparteum</i> E.Mey. ex Sond.                   | Chase 637 (K)                                                    | Y15026              | AJ387958 AJ387958                                                 |
| <i>Neoluederitzia sericeocarpa</i> Schinz                    | Chase 642 (K)                                                    | Y15023              | AJ387953 AJ387953                                                 |
| <i>Balanites maughamii</i> Sprague                           | Chase 635 (K)                                                    | JF265296            | AJ387946 AJ387946                                                 |
| <i>Balanites pedicellaris</i> Mildbr. & Schltr.              | OM901                                                            | JF265297            |                                                                   |
| <i>Morkillia mexicana</i> (DC.) Rose & Painter               | Anderson 13526 (MICH, NY)                                        | AJ133857            | AJ387952 AJ387952                                                 |
| <i>Viscainoa geniculata</i> (Kellogg) Greene                 | Chase 634 (K)                                                    | Y15029              | AJ387962 AJ387962                                                 |

|                                             |                                 |          |          |          |          |
|---------------------------------------------|---------------------------------|----------|----------|----------|----------|
| <i>Sericodes greggii</i> A. Gray            | Rollins & Roby 76014<br>(NY, H) | AJ387962 | AJ387957 | AJ387957 |          |
| <i>Krameria lanceolata</i> Torr.            | Simpson 88-05-1-1 (MICH)        | Y15032   |          |          | AY261080 |
| <i>Krameria ixine</i> L.                    | Fernandez 22529                 | EU644679 |          |          | AY260995 |
| <i>Albizia procera</i> (Roxb.) Benth.       | DS14502_JM1604                  | KC417044 | EU440009 |          |          |
| <i>Geranium sibiricum</i> L.                | Seonjoo and Woo 2040501         | JX913498 | DQ267175 |          |          |
| <i>Sterculia pruriens</i> (Aubl.) K. Schum. | NH200020                        | JQ625993 | FJ039232 |          |          |
| <i>Punica granatum</i> L.                   | Hao 2000-0318 (SYS)             | JQ730672 | AY905483 |          |          |
| <i>Vitis aestivalis</i> Michx.              | Wen 10428 (US)                  | L01960   | HM223286 |          |          |

---

**Table S2**

| Dataset       | Model              | -lnL      | AIC        | A: C: G: T                     | P_inv  | Shape  |
|---------------|--------------------|-----------|------------|--------------------------------|--------|--------|
| <i>rbcL</i>   | GTR + I + $\Gamma$ | 6793.5049 | 13863.0098 | 0.2850: 0.1787: 0.2250: 0.3113 | 0.5900 | 0.9210 |
| <i>trnL</i>   | GTR + I + $\Gamma$ | 5361.7718 | 11347.5437 | 0.4338: 0.1174: 0.1321: 0.3167 | 0.1970 | 1.5150 |
| <i>trnL-F</i> | GTR + I + $\Gamma$ | 3342.2175 | 7120.435   | 0.4642: 0.1291: 0.1133: 0.3934 | 0.0000 | 2.2380 |
| ITS           | GTR + $\Gamma$     | 7770.0399 | 15826.0797 | 0.2392: 0.2956: 0.2637: 0.2014 | -      | 0.6150 |

The best-fit model was determined by the Akaike information criterion (AIC) in

jModelTest. “-” indicates inapplicable.

Table S3

| Region           | Taxon                                                 | Crown group age (95% HPD) | Ancestral habitat  | Comment                                                                                                                                                                                                                                                                                                                              |
|------------------|-------------------------------------------------------|---------------------------|--------------------|--------------------------------------------------------------------------------------------------------------------------------------------------------------------------------------------------------------------------------------------------------------------------------------------------------------------------------------|
| <b>Africa</b>    |                                                       |                           |                    |                                                                                                                                                                                                                                                                                                                                      |
|                  | <i>Vachellia</i> (Fabaceae)                           | 16.6 (13.5–23.4)          | dryland            | African species of <i>Vachellia</i> is mainly distributed in dry woodlands except that three species inhabit in mesic forests [1]. Our inference of habitat evolution indicates that the most recent common ancestor (MRCA) of African <i>Vachellia</i> occurred in dryland habitat (Additional file 2: Figure S4a).                 |
|                  | Sect. <i>Euphorbia</i> (Euphorbiaceae)                | 14 (10.5–17.8)            | dryland            | Most of Sect. <i>Euphorbia</i> species are dominants of dryland floras throughout Africa (including Madagascar) except that a few of species inhabit in humid montane regions [2, 3]. Our inference of habitat evolution indicates that the MRCA of Sect. <i>Euphorbia</i> lived in dryland habitat (Additional file 2: Figure S4b). |
| <b>Asia</b>      |                                                       |                           |                    |                                                                                                                                                                                                                                                                                                                                      |
|                  | <i>Caragana</i> (Fabaceae)                            | 18.37 (12.11–25.87)       | dryland (steppe)   | Species of <i>Caragana</i> are primarily restricted to dryland floras, with a few outliers extending to non-dryland floras. Zhang et al. inferred evolution of habitats in the genus and found that its MRCA inhabited in Junggar steppe of Northwest dryland region of China [4].                                                   |
|                  | <i>Consolida</i> (Ranunculaceae)                      | 16.9 (13.4–20.9)          | dryland            | Species of <i>Consolida</i> are mainly distributed in central Asian and Irano-Turanian dryland regions, with a few extending to the Mediterranean basin [5]. Our inference of habitat evolution indicates that the MRCA of <i>Consolida</i> occurred in dryland habitat (Additional file 2: Figure S4c).                             |
| <b>Australia</b> |                                                       |                           |                    |                                                                                                                                                                                                                                                                                                                                      |
|                  | <i>Austrostipa</i> (Poaceae)                          | 14.55 (6.48–24.21)        | dryland            | Genus <i>Austrostipa</i> is a major component of dryland grasslands in Australia, with a few outliers extending to other habitats [6]. Our inference of habitat evolution indicates that the MRCA of <i>Consolida</i> occurred in dryland habitat (Additional file 2: Figure S4d).                                                   |
|                  | Triodiinae (Poaceae)                                  | 14.7 (11.4–18.3)          | dryland (eremaeon) | Toon et al. reconstruct evolution of habitats in Triodiinae and identified eremaeon as the ancestral biome for the subtribe [7].                                                                                                                                                                                                     |
| <b>New World</b> |                                                       |                           |                    |                                                                                                                                                                                                                                                                                                                                      |
|                  | Sect. <i>Cochranea</i> (Heliotropiaceae) <sup>a</sup> | 14 (12–16)                | dryland            | Based on Luebert and Wen [8], Sect. <i>Cochranea</i> is entirely distributed in dryland regions.                                                                                                                                                                                                                                     |
|                  | Carnosae + Giganteae (Oxalidaceae) <sup>a</sup>       | 13.29 (7.81–19.19)        | dryland (desert)   | Heibl and Renner inferred evolution of habitats of <i>Oxalis</i> and found that Carnosae and Giganteae of the genus diversified in desert [9].                                                                                                                                                                                       |
|                  | Cacteae (Cactaceae) <sup>b</sup>                      | 11.94 (8.33–17.27)        | dryland (desert)   | Tribe Cacteae is mainly distributed in the southern Chihuahuan Desert [10].                                                                                                                                                                                                                                                          |



|                                                             |                    |         |                                                                                                                                                                                                                                                                                                                                                                                                                                   |
|-------------------------------------------------------------|--------------------|---------|-----------------------------------------------------------------------------------------------------------------------------------------------------------------------------------------------------------------------------------------------------------------------------------------------------------------------------------------------------------------------------------------------------------------------------------|
| <i>Ephedra</i> (Ephedraceae) <sup>b</sup>                   | 15.31 (9.84–20.89) | dryland | Hernández-Hernández et al. performed the reconstruction of ancestral ranges in Cactaceae and indicated that the MRCA of the tribe occurred in the southern Chihuahuan Desert [11].                                                                                                                                                                                                                                                |
| Subsect. <i>Hypericifoliae</i> (Euphorbiaceae) <sup>b</sup> | 15.3 (10.5–20.2)   | dryland | Based on Lorea et al. [12], western North American <i>Ephedra</i> plants are entirely restricted to in dryland regions.<br>Subsect. <i>Hypericifoliae</i> is mainly distributed in dryland regions of North America, with a few species growing in the understory of mesic forests [3]. Our inference of habitat evolution indicates that the MRCA of the subsection occurred in dryland habitat (Additional file 2: Figure S4e). |

---

HPD = highest posterior density. <sup>a,b</sup>Taxa are from tropical America and western North America, respectively.

Notes: Five plant groups, *Vachellia*, Sect. *Euphorbia*, *Consolida*, *Austrostipa*, and Subsect. *Hypericifoliae*, are primarily restricted to dryland habitats, with a few outliers extending to non-dryland habitats. In order to determine their ancestral habitats, we inferred evolutionary patterns of habitats using parsimony method as implemented in Mesquite v2.75 [13]. To simplify our analyses, habitat types were coded as dryland or non-dryland. Data are obtained from several sources (Electronic databases: [www.efloras.org](http://www.efloras.org); personal observation in herbarium specimens; and GBIF website (<https://www.gbif.org/>)). The phylogenetic trees of these five groups are modified from the trees generated from previous studies: African *Vachellia* from Bouchenak-Khelladi et al. [1], Sect. *Euphorbia* and Subsect. *Hypericifoliae* from Horn et al. [3], *Consolida* from Jabbour and Renner [5], and *Austrostipa* from Syme [6]. Our inferring results are indicated in Additional file 2: Figure S4a-e. For *Caragana*, Triodiinae, and Cactaceae, which occur in dryland and non-dryland habitats, Zhang et al. [4], Toon et al. [7], and Hernández-Hernández et al. [11] have ascertained dryland habitats as their ancestral floras, respectively. Other three groups are entirely distributed in dryland floras: Sect. *Cochranea* [8], Carnosae + Giganteae [9], and North American *Ephedra* [12].

## References

1. Bouchenak-Khelladi Y, Maurin O, Hurter J, van der Bank M. The evolutionary history and biogeography of Mimosoideae (Leguminosae): An emphasis on African acacias. *Mol Phylogenet Evol.* 2010;57:495–508.
2. Horn JW, van Ee BW, Morawetz JJ, Riina R, Steinmann VW, Berry PE, et al. Phylogenetics and the evolution of major structural characters in the giant genus *Euphorbia* L. (Euphorbiaceae). *Mol Phylogenet Evol.* 2012;63:305–26.
3. Horn JW, Xi ZX, Riina R, Peirson JA, Yang Y, Dorsey BL, et al. Evolutionary bursts in *Euphorbia* (Euphorbiaceae) are linked with photosynthetic pathway. *Evolution.* 2014;68:3485–504.
4. Zhang ML, Xiang XG, Xue JJ, Sanderson SC, Fritsch PW. Himalayan uplift shaped biomes in Miocene temperate Asia: evidence from leguminous *Caragana*. *Sci Rep.* 2016;6:36528.
5. Jabbour F, Renner SS. *Consolida* and *Aconitella* are an annual clade of *Delphinium* (Ranunculaceae) that diversified in the Mediterranean basin and the Irano-Turanian region. *Taxon.* 2011;60:1029–40.
6. Syme AE. Diversification rates in the Australasian endemic grass *Austrostipa*: 15 million years of constant evolution. *Plant Syst Evol.* 2012;298:221–7.
7. Toon A, Crisp MD, Gamage H, Mant J, Morris DC, Schmidt S, et al. Key innovation or adaptive change? A test of leaf traits using Triodiinae in Australia. *Sci Rep.* 2015;5:12398.
8. Luebert F, Wen J. Phylogenetic Analysis and Evolutionary Diversification of *Heliotropium* Sect. *Cochranea* (Heliotropiaceae) in the Atacama Desert. *Syst Bot.* 2008;33:390–402.
9. Heibl C, Renner SS. Distribution Models and a Dated Phylogeny for Chilean *Oxalis* Species Reveal Occupation of New Habitats by Different Lineages, not Rapid Adaptive Radiation. *Syst Biol.* 2012;61:823–34.
10. Hernández HM, Gómez-Hinostrosa C. Cactus diversity and endemism in the Chihuahuan Desert Region. In: Cartron JL, Editor. Biodiversity and conservation in Northern Mexico. Oxford University Press; 2005. pp. 264–275.
11. Hernández-Hernández T, Brown JW, Schlumberger BO, Eguiarte LE, Magallón S. Beyond aridification: multiple explanations for the elevated diversification of cacti in the New World Succulent Biome. *New Phytol.* 2014;202:1382–97.
12. Loera I, Sosa V, Ickert-Bond S. Diversification in North American arid lands: Niche conservatism, divergence and expansion of habitat explain speciation in the genus *Ephedra*. *Mol Phylogenet Evol.* 2012;65:437–50.
13. Maddison WP, Maddison DR. 2011. Mesquite: a modular system for evolutionary analysis, v1.12. Available at <http://mesquiteproject.org>. Accessed 21 Aug 2017.
